# Supplementary material for: Immunogenicity and safety of reduced-antigen tetanus, diphtheria and acellular pertussis vaccination in adults treated for obstructive airway diseases
Source: PubMed Central journal article supplement — Hum Vaccin Immunother. 2023 Feb 6;19(1):2159731. doi: 10.1080/21645515.2022.2159731 (PMC9980557; doi:10.1080/21645515.2022.2159731), 2023-02-06
Supplement: KHVI_A_2159731_SM0843.pdf [file KHVI_A_2159731_SM0843.pdf]

**Table S4.** Number and percentage of adults under active treatment for obstructive airway diseases reporting unsolicited adverse events within 31 days post-vaccination (total vaccinated cohort)

| Event by MedDRA primary system organ class and preferred term | OAD-treated adults (meta-analysis) |                   |
|---------------------------------------------------------------|------------------------------------|-------------------|
|                                                               | N=222                              |                   |
|                                                               | n                                  | % (95% CI)        |
| At least 1 symptom                                            | 67                                 | 30.2 (24.2; 36.7) |
| Blood and lymphatic system disorders                          |                                    |                   |
| Lymph node pain                                               | 1                                  | 0.5 (0.0; 2.5)    |
| Lymphadenitis                                                 | 1                                  | 0.5 (0.0; 2.5)    |
| Cardiac disorders                                             |                                    |                   |
| Cardiac failure congestive                                    | 1                                  | 0.5 (0.0; 2.5)    |
| Diastolic dysfunction                                         | 1                                  | 0.5 (0.0; 2.5)    |
| Left ventricular hypertrophy                                  | 1                                  | 0.5 (0.0; 2.5)    |
| Ear and labyrinth disorders                                   |                                    |                   |
| Deafness                                                      | 1                                  | 0.5 (0.0; 2.5)    |
| Eye disorders                                                 |                                    |                   |
| Eye irritation                                                | 1                                  | 0.5 (0.0; 2.5)    |
| Gastrointestinal disorders                                    |                                    |                   |
| Abdominal pain                                                | 1                                  | 0.5 (0.0; 2.5)    |
| Diarrhea                                                      | 1                                  | 0.5 (0.0; 2.5)    |
| Dyspepsia                                                     | 1                                  | 0.5 (0.0; 2.5)    |
| Gastroesophageal reflux disease                               | 1                                  | 0.5 (0.0; 2.5)    |
| Nausea                                                        | 1                                  | 0.5 (0.0; 2.5)    |
| General disorders and administration site conditions          |                                    |                   |
| Chills                                                        | 1                                  | 0.5 (0.0; 2.5)    |
| Crying                                                        | 1                                  | 0.5 (0.0; 2.5)    |
| Fatigue                                                       | 2                                  | 0.9 (0.1; 3.2)    |
| Injection site bruising                                       | 1                                  | 0.5 (0.0; 2.5)    |

|                                                |   |                |
|------------------------------------------------|---|----------------|
| Injection site discomfort                      | 1 | 0.5 (0.0; 2.5) |
| Injection site induration                      | 1 | 0.5 (0.0; 2.5) |
| Injection site pain                            | 1 | 0.5 (0.0; 2.5) |
| Injection site paresthesia                     | 1 | 0.5 (0.0; 2.5) |
| Injection site pruritus                        | 4 | 1.8 (0.5; 4.5) |
| Injection site reaction                        | 1 | 0.5 (0.0; 2.5) |
| Mass                                           | 1 | 0.5 (0.0; 2.5) |
| Pain                                           | 2 | 0.9 (0.1; 3.2) |
| Infections and infestations                    |   |                |
| Bacterial vaginosis                            | 1 | 0.5 (0.0; 2.5) |
| Bronchitis                                     | 4 | 1.8 (0.5; 4.5) |
| Conjunctivitis bacterial                       | 1 | 0.5 (0.0; 2.5) |
| Diverticulitis                                 | 1 | 0.5 (0.0; 2.5) |
| Enterococcal sepsis                            | 1 | 0.5 (0.0; 2.5) |
| Fungal infection                               | 1 | 0.5 (0.0; 2.5) |
| Gastroenteritis                                | 2 | 0.9 (0.1; 3.2) |
| Gastroenteritis viral                          | 2 | 0.9 (0.1; 3.2) |
| Infection                                      | 1 | 0.5 (0.0; 2.5) |
| Influenza                                      | 1 | 0.5 (0.0; 2.5) |
| Laryngitis                                     | 1 | 0.5 (0.0; 2.5) |
| Nasopharyngitis                                | 7 | 3.2 (1.3; 6.4) |
| Pharyngitis                                    | 1 | 0.5 (0.0; 2.5) |
| Respiratory tract infection viral              | 1 | 0.5 (0.0; 2.5) |
| Sinusitis                                      | 3 | 1.4 (0.3; 3.9) |
| Upper respiratory tract infection              | 3 | 1.4 (0.3; 3.9) |
| Urinary tract infection                        | 2 | 0.9 (0.1; 3.2) |
| Viral infection                                | 2 | 0.9 (0.1; 3.2) |
| Vulvovaginal mycotic infection                 | 1 | 0.5 (0.0; 2.5) |
| Injury, poisoning and procedural complications |   |                |
| Arthropod bite                                 | 2 | 0.9 (0.1; 3.2) |

|                                                                     |   |                |
|---------------------------------------------------------------------|---|----------------|
| Injury                                                              | 2 | 0.9 (0.1; 3.2) |
| Spinal compression fracture                                         | 1 | 0.5 (0.0; 2.5) |
| Investigations                                                      |   |                |
| Blood cholesterol increased                                         | 1 | 0.5 (0.0; 2.5) |
| Metabolism and nutrition disorders                                  |   |                |
| Dehydration                                                         | 1 | 0.5 (0.0; 2.5) |
| Musculoskeletal and connective tissue disorders                     |   |                |
| Arthralgia                                                          | 3 | 1.4 (0.3; 3.9) |
| Back pain                                                           | 2 | 0.9 (0.1; 3.2) |
| Joint stiffness                                                     | 1 | 0.5 (0.0; 2.5) |
| Musculoskeletal stiffness                                           | 1 | 0.5 (0.0; 2.5) |
| Myalgia                                                             | 2 | 0.9 (0.1; 3.2) |
| Osteoarthritis                                                      | 1 | 0.5 (0.0; 2.5) |
| Neoplasms benign, malignant and unspecified (incl cysts and polyps) |   |                |
| Bronchial carcinoma                                                 | 1 | 0.5 (0.0; 2.5) |
| Cervix carcinoma                                                    | 1 | 0.5 (0.0; 2.5) |
| Prostate cancer                                                     | 1 | 0.5 (0.0; 2.5) |
| Nervous system disorders                                            |   |                |
| Headache                                                            | 3 | 1.4 (0.3; 3.9) |
| Migraine                                                            | 1 | 0.5 (0.0; 2.5) |
| Taste disorder                                                      | 1 | 0.5 (0.0; 2.5) |
| Psychiatric disorders                                               |   |                |
| Depression                                                          | 1 | 0.5 (0.0; 2.5) |
| Insomnia                                                            | 1 | 0.5 (0.0; 2.5) |
| Irritability                                                        | 2 | 0.9 (0.1; 3.2) |
| Renal and urinary disorders                                         |   |                |
| Acute kidney injury                                                 | 1 | 0.5 (0.0; 2.5) |
| Hydronephrosis                                                      | 1 | 0.5 (0.0; 2.5) |
| Nephrolithiasis                                                     | 1 | 0.5 (0.0; 2.5) |
| Respiratory, thoracic and mediastinal disorders                     |   |                |

|                                        |   |                |
|----------------------------------------|---|----------------|
| Asthma                                 | 2 | 0.9 (0.1; 3.2) |
| Chronic obstructive pulmonary disease  | 2 | 0.9 (0.1; 3.2) |
| Cough                                  | 2 | 0.9 (0.1; 3.2) |
| Oropharyngeal pain                     | 4 | 1.8 (0.5; 4.5) |
| Pulmonary hypertension                 | 1 | 0.5 (0.0; 2.5) |
| Rhinorrhea                             | 2 | 0.9 (0.1; 3.2) |
| Sneezing                               | 1 | 0.5 (0.0; 2.5) |
| Wheezing                               | 2 | 0.9 (0.1; 3.2) |
| Skin and subcutaneous tissue disorders |   |                |
| Piloerection                           | 1 | 0.5 (0.0; 2.5) |
| Urticaria                              | 1 | 0.5 (0.0; 2.5) |
| Vascular disorders                     |   |                |
| Hematoma                               | 1 | 0.5 (0.0; 2.5) |

---

MedDRA, Medical Dictionary for Regulatory Activities; OAD, obstructive airway disease; N, number of adults in the total vaccinated cohort; n/%, number/percentage of participants in a given category; CI, confidence interval.
