# Supplementary material for: Immunogenicity and safety of reduced-antigen tetanus, diphtheria and acellular pertussis vaccination in adults treated for obstructive airway diseases
Source: PubMed Central journal article supplement — Hum Vaccin Immunother. 2023 Feb 6;19(1):2159731. doi: 10.1080/21645515.2022.2159731 (PMC9980557; doi:10.1080/21645515.2022.2159731), 2023-02-06
Supplement: KHVI_A_2159731_SM0845.pdf [file KHVI_A_2159731_SM0845.pdf]

**Table S3.** Participants under obstructive airway disease treatment by ATC subgroups (total vaccinated cohort)

| ATC chemical-therapeutic-pharmacological subgroup, n (%)                                           | OAD-treated adults<br>(meta-analysis)<br>N=222 |
|----------------------------------------------------------------------------------------------------|------------------------------------------------|
| Adrenergics, inhalants (R03A)                                                                      |                                                |
| Alpha- and beta-adrenoreceptor agonists (R03AA)                                                    | 7 (3.2)                                        |
| Non-selective beta-adrenoreceptor agonists (R03AB)                                                 | 1 (0.5)                                        |
| Selective beta-2-adrenoreceptor agonists (R03AC)                                                   | 134 (60.4)                                     |
| Adrenergics in combination with corticosteroids or other drugs, excluding anticholinergics (R03AK) | 89 (40.1)                                      |
| Other drugs for obstructive airway diseases, inhalants (R03B)                                      |                                                |
| Glucocorticoids (R03BA)                                                                            | 43 (19.4)                                      |
| Anticholinergics (R03BB)                                                                           | 38 (17.1)                                      |
| Antiallergic agents, excluding corticosteroids (R03BC)                                             | 2 (0.9)                                        |
| Other drugs for obstructive airway diseases, inhalants (R03BX)                                     | 3 (1.4)                                        |
| Adrenergics for systemic use (R03C)                                                                |                                                |
| Non-selective beta-adrenoreceptor agonists (R03CB)                                                 | 1 (0.5)                                        |
| Selective beta-2-adrenoreceptor agonists (R03CC)                                                   | 129 (58.1)                                     |
| Adrenergics and other drugs for obstructive airway diseases (R03CK)                                | 2 (0.9)                                        |
| Other systemic drugs for obstructive airway diseases (R03D)                                        |                                                |
| Xanthines (R03DA)                                                                                  | 3 (1.4)                                        |
| Leukotriene receptor antagonists (R03DC)                                                           | 19 (8.6)                                       |
| Corticosteroids, plain (D07A)                                                                      |                                                |
| Corticosteroids, weak (group I) (D07AA)                                                            | 2 (0.9)                                        |
| Corticosteroids, moderately potent (group II) (D07AB)                                              | 2 (0.9)                                        |
| Corticosteroids, potent (group III) (D07AC)                                                        | 23 (10.4)                                      |

ATC, Anatomical Therapeutic Chemical; n, number of participants in a given category; OAD, obstructive airway disease; N, number of adults in the total vaccinated cohort.
