# Supplementary material for: Immunogenicity and safety of reduced-antigen tetanus, diphtheria and acellular pertussis vaccination in adults treated for obstructive airway diseases
Source: PubMed Central journal article supplement — Hum Vaccin Immunother. 2023 Feb 6;19(1):2159731. doi: 10.1080/21645515.2022.2159731 (PMC9980557; doi:10.1080/21645515.2022.2159731), 2023-02-06
Supplement: KHVI_A_2159731_SM0848.pdf [file KHVI_A_2159731_SM0848.pdf]

**Table S2.** Overview of the studies included in the meta-analysis

| eTrack number / NCT number | Abbreviated title | Country   | Study duration      | N  | Inclusion criteria <sup>a</sup>                                                                                                               | Exclusion criteria <sup>a</sup>                                                                                                                                                                                                                                                                                                                                                                                                                      |
|----------------------------|-------------------|-----------|---------------------|----|-----------------------------------------------------------------------------------------------------------------------------------------------|------------------------------------------------------------------------------------------------------------------------------------------------------------------------------------------------------------------------------------------------------------------------------------------------------------------------------------------------------------------------------------------------------------------------------------------------------|
| 263855/002 / NCT01267058   | Tdap-002          | Australia | 11/9/1997–26/2/1998 | 38 | Healthy men or women aged ≥18 years at the time of vaccination.                                                                               | <ul style="list-style-type: none"> <li>• Major congenital defects or serious chronic illness.</li> <li>• History of progressive neurological disease.</li> <li>• Any suspected or confirmed immune disorder (including HIV infection).</li> <li>• Immunosuppressive therapy (except topical corticosteroids).</li> <li>• Immunoglobulin therapy or administration of any blood products within the previous 3 months or during the study.</li> </ul> |
| 106316 / NCT00346073       | Tdap0.3-007       | US        | 13/7/2006–17/4/2007 | 51 | Men or women aged 19–64 years at the time of vaccination; healthy as established by medical history and history-directed physical examination | <ul style="list-style-type: none"> <li>• Any confirmed or suspected immunosuppressive or immunodeficient condition based on medical history and physical examination (no laboratory testing required).</li> <li>• History of encephalopathy (e.g., coma, decreased level of consciousness, prolonged seizures) within 7 days of administration of a previous dose of pertussis vaccine that was not</li> </ul>                                       |

before entering the study. attributable to another identifiable cause.

- Progressive neurological disorder, uncontrolled epilepsy or progressive encephalopathy: pertussis vaccine was not to be administered to individuals with these conditions until a treatment regimen had been established and the condition had stabilized.

- Acute disease at the time of vaccination, defined as the presence of a moderate or severe illness with or without fever.

Vaccines could be administered to persons with a minor illness such as diarrhea or mild upper respiratory infection without fever, i.e., oral/axillary temperature <99.5°F (37.5°C).

- Chronic administration (defined as more than 14 days) of immunosuppressants or other immune-modifying drugs within 6 months prior to study vaccine administration. For corticosteroids, this meant prednisone, or equivalent,  $\geq 0.5$  mg/kg/day. Inhaled and topical steroids were allowed.

|                         |             |    |                          |    |                                                                                                                                      |                                                                                                                                                                                                                                                                                                                                                                                                                                                                                                                                                                                                                                                                                                                                                                                                                                                                                                                                        |
|-------------------------|-------------|----|--------------------------|----|--------------------------------------------------------------------------------------------------------------------------------------|----------------------------------------------------------------------------------------------------------------------------------------------------------------------------------------------------------------------------------------------------------------------------------------------------------------------------------------------------------------------------------------------------------------------------------------------------------------------------------------------------------------------------------------------------------------------------------------------------------------------------------------------------------------------------------------------------------------------------------------------------------------------------------------------------------------------------------------------------------------------------------------------------------------------------------------|
| 106323 /<br>NCT00385255 | Tdap0.3-008 | US | 23/10/2006–<br>28/2/2007 | 25 | Healthy men or women aged 19–64 years (for the primary cohort) or ≥65 years (for the exploratory cohort) at the time of vaccination. | <ul style="list-style-type: none"> <li>• Administration of immunoglobulins and/or any blood products within the 3 months preceding the administration of study vaccine or planned administration during the active phase of the study.</li> <li>• Any confirmed or suspected immunosuppressive or immunodeficient condition based on medical history and physical examination (no laboratory testing required).</li> <li>• History of serious allergic reaction (e.g., anaphylaxis) following any other tetanus toxoid-, diphtheria toxoid- or pertussis-containing vaccine, influenza vaccine or any component of the study vaccines, including egg or chicken proteins or latex.</li> <li>• History of encephalopathy (e.g., coma, decreased level of consciousness, prolonged seizures) within 7 days of administration of a previous dose of pertussis vaccine that was not attributable to another identifiable cause.</li> </ul> |
|-------------------------|-------------|----|--------------------------|----|--------------------------------------------------------------------------------------------------------------------------------------|----------------------------------------------------------------------------------------------------------------------------------------------------------------------------------------------------------------------------------------------------------------------------------------------------------------------------------------------------------------------------------------------------------------------------------------------------------------------------------------------------------------------------------------------------------------------------------------------------------------------------------------------------------------------------------------------------------------------------------------------------------------------------------------------------------------------------------------------------------------------------------------------------------------------------------------|

- Progressive neurological disorder, uncontrolled epilepsy or progressive encephalopathy: pertussis vaccine was not to be administered to individuals with these conditions until a treatment regimen had been established and the condition had stabilized.

- Acute disease at the time of vaccination, defined as the presence of a moderate or severe illness with or without fever. Vaccines could be administered to persons with a minor illness such as diarrhea or mild upper respiratory infection without fever, i.e., oral/axillary temperature <99.5°F (37.5°C).

- Chronic administration (defined as more than 14 days) of immunosuppressants or other immune-modifying drugs within 6 months prior to vaccination or planned administration during the study. For corticosteroids, this meant prednisone, or equivalent,  $\geq 0.5$  mg/kg/day for more than 14 days. Inhaled and topical steroids were allowed.

|             |             |    |                                                                                              |          |                                                                                                                                                                                                               |                                                                                                                                                                                                                                                                                                                                                                                                                                                                                                                                                                                                                                                                                                                                                            |
|-------------|-------------|----|----------------------------------------------------------------------------------------------|----------|---------------------------------------------------------------------------------------------------------------------------------------------------------------------------------------------------------------|------------------------------------------------------------------------------------------------------------------------------------------------------------------------------------------------------------------------------------------------------------------------------------------------------------------------------------------------------------------------------------------------------------------------------------------------------------------------------------------------------------------------------------------------------------------------------------------------------------------------------------------------------------------------------------------------------------------------------------------------------------|
| 111413 /    | Tdap0.3-011 | US | Active                                                                                       | 64       | Men or women                                                                                                                                                                                                  | <ul style="list-style-type: none"> <li>• Administration of immunoglobulins and/or any blood products within the 3 months preceding vaccination or planned administration during the study.</li> </ul>                                                                                                                                                                                                                                                                                                                                                                                                                                                                                                                                                      |
| NCT00835237 |             |    | phase:<br>17/2/2009–<br>23/7/2009<br>Extended<br>safety<br>follow-up:<br>until<br>15/10/2009 | aged ≥65 | years at the<br>time of study<br>entry; free of<br>an acute<br>aggravation of<br>the health<br>status as<br>established by<br>medical history<br>and clinical<br>examination<br>before entering<br>the study. | <ul style="list-style-type: none"> <li>• Progressive neurologic disorder, uncontrolled epilepsy or progressive encephalopathy: pertussis vaccine was not to be administered to individuals with these conditions until a treatment regimen was established and the condition had stabilized.</li> <li>• Acute (active) clinically significant pulmonary, cardiovascular, hepatic or renal functional abnormality, as determined by clinical evaluation (medical history and medical history-directed physical examination) or pre-existing laboratory screening tests.</li> <li>• Any confirmed or suspected immunosuppressive or immunodeficient condition based on medical history and physical examination (no laboratory testing required).</li> </ul> |

- Chronic administration (defined as more than 14 days) of immunosuppressants or other immune-modifying drugs within 6 months prior to vaccination or planned administration during the study. For corticosteroids, this meant prednisone, or equivalent,  $\geq 0.5$  mg/kg/day for more than 14 days. Inhaled and topical steroids were allowed.

- Administration of immunoglobulins and/or any blood products within the 3 months preceding vaccination or planned administration during the study.

|                         |            |    |                        |    |                                                                     |                                                                                                                                                                                                                                                                                                                                                                                                                                   |
|-------------------------|------------|----|------------------------|----|---------------------------------------------------------------------|-----------------------------------------------------------------------------------------------------------------------------------------------------------------------------------------------------------------------------------------------------------------------------------------------------------------------------------------------------------------------------------------------------------------------------------|
| 116887 /<br>NCT02052596 | Zoster-042 | US | 7/2/2014–<br>21/4/2016 | 44 | Men or women aged $\geq 50$ years at the time of first vaccination. | <ul style="list-style-type: none"> <li>• Any condition which, in the opinion of the investigator, prevented the person from participating in the study.</li> <li>• Any condition that, in the judgement of the investigator, would make intramuscular injection unsafe.</li> <li>• Encephalopathy (e.g., coma, decreased consciousness, prolonged seizures) not attributable to an identifiable cause within 7 days of</li> </ul> |
|-------------------------|------------|----|------------------------|----|---------------------------------------------------------------------|-----------------------------------------------------------------------------------------------------------------------------------------------------------------------------------------------------------------------------------------------------------------------------------------------------------------------------------------------------------------------------------------------------------------------------------|

administration of a previous pertussis antigen-containing vaccine.

- Progressive or unstable neurological disorder.
- Any confirmed or suspected immunosuppressive or immunodeficient condition resulting from disease (e.g., malignancy, HIV infection) or immunosuppressive/cytotoxic therapy (e.g., medications used during cancer chemotherapy, organ transplantation or to treat autoimmune disorders).
- Chronic administration (defined as more than 14 consecutive days) of immunosuppressants or other immune-modifying drugs within 6 months prior to the first vaccine dose. For corticosteroids, this meant prednisone  $\geq 20$  mg/day, or equivalent; a prednisone dose of  $< 20$  mg/day was allowed. Inhaled, topical and intra-articular corticosteroids were allowed.
- Administration of long-acting immune-modifying drugs (e.g., infliximab) within 6 months prior to

the first vaccine dose or expected administration at any time during the study.

- Administration of immunoglobulins and/or any blood products within the 3 months preceding the first dose of study vaccine or planned administration during the study.

---

Tdap, GSK's reduced-antigen tetanus, diphtheria and acellular pertussis vaccine; N, number of participants in the meta-analysis (total vaccinated cohort); HIV, human immunodeficiency virus; US, United States.

<sup>a</sup>Only criteria relevant for the current meta-analysis are shown.
