# Supplementary material for: Immunogenicity and safety of reduced-antigen tetanus, diphtheria and acellular pertussis vaccination in adults treated for obstructive airway diseases
Source: PubMed Central journal article supplement — Hum Vaccin Immunother. 2023 Feb 6;19(1):2159731. doi: 10.1080/21645515.2022.2159731 (PMC9980557; doi:10.1080/21645515.2022.2159731), 2023-02-06
Supplement: KHVI_A_2159731_SM0852.pdf [file KHVI_A_2159731_SM0852.pdf]

**Table S1.** Outcome of study review and study selection

| Study eTrack number / NCT number | Study abbreviated title | Inclusion/exclusion with rationale                                                                                                                                           |
|----------------------------------|-------------------------|------------------------------------------------------------------------------------------------------------------------------------------------------------------------------|
| 263855/002 / NCT01267058         | Tdap-002                | Included. Immunogenicity and safety data for the Tdap group only                                                                                                             |
| 106316 / NCT00346073             | Tdap0.3-007             | Included. Immunogenicity and safety data for the Tdap group only                                                                                                             |
| 106323 / NCT00385255             | Tdap0.3-008             | Included. Immunogenicity and safety data for the sequential administration group only and for both the primary cohort and the exploratory cohort of adults aged 65 and older |
| 111413 / NCT00835237             | Tdap0.3-011             | Included. Immunogenicity and safety data for the Tdap group only                                                                                                             |
| 116887 / NCT02052596             | Zoster-042              | Included. Immunogenicity and safety for the sequential administration group only                                                                                             |
| 263855/028                       | Tdap-028                | Excluded. Too low number of participants using treatment for obstructive airway diseases                                                                                     |
| 263855/034 / NCT01294605         | Tdap-034                | Excluded. Too low number of participants using treatment for obstructive airway diseases                                                                                     |
| 201532 / NCT03311659             | Tdap-050                | Excluded. Too low number of participants using treatment for obstructive airway diseases                                                                                     |
| 711866/003 / NCT01277705         | Tdap-IPV-003            | Excluded. Too low number of participants using treatment for obstructive airway diseases                                                                                     |

Tdap, GSK's reduced-antigen tetanus-diphtheria-acellular pertussis vaccine; Tdap-IPV, GSK's reduced-antigen tetanus-diphtheria-acellular pertussis-inactivated poliovirus vaccine.

The studies included in the meta-analysis were conducted in the United States (US) or Australia. Tdap is produced in 2 different formulations, 1 for use in the US, 1 outside the US. The 2 formulations contain the same amounts of each antigen, but the non-US formulation contains a higher amount of aluminum (0.3 mg Al(OH)<sub>3</sub> + 0.2 mg AlPO<sub>4</sub>) than the US formulation (0.3 mg Al(OH)<sub>3</sub>).
